# Supplementary material for: Bottomland hardwood forest growth and stress response tohydroclimatic variation: Evidence from dendrochronology andtree-ring δ 13 C values
Source: Copernicus journal article supplement (doi:10.5194/bg-2020-131), 2020-04-28
Supplement: Supplementary file [file bg-2020-131-RC1-supplement.pdf]

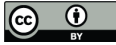

1 **Bottomland hardwood forest growth and stress response to**  
2 **hydroclimatic variation: Evidence from dendrochronology and**  
3 **tree-ring  $\delta^{13}\text{C}$  values**

4 Ajinkya G. Deshpande<sup>1</sup>, Thomas W. Boutton<sup>1</sup>, Charles W. Lafon<sup>2</sup>, Georgianne W. Moore<sup>1</sup>

5 <sup>1</sup>Department of Ecology and Conservation Biology, Texas A&M University, College Station, TX  
6 77843, USA

7 <sup>2</sup>Department of Geography, Texas A&M University, College Station, TX 77843, USA

8 *Correspondence to:* Ajinkya G. Deshpande (ajinkyagd@tamu.edu)

9 **Abstract.** Wetland forests around the world have been reduced to a small proportion of their  
10 original expanse due to changing climatic conditions and intensification of human land use  
11 activities. As a case in point, the Columbia bottomland hardwood forests along the Brazos-  
12 Colorado Coastal Basin on the Gulf coast of Texas are currently threatened by an increasingly  
13 erratic hydroclimate in the form of both extreme floods as well as droughts, and by urban  
14 expansion. In this study, we use dendrochronology and tree-ring carbon isotopes to understand the  
15 effect of changing hydroclimatic conditions on the functional attributes of these forests. We  
16 examined tree-rings of *Quercus nigra* at four sites within the Columbia bottomlands, of which one  
17 site experiences frequent and prolonged flooding, while the other three are less flood-prone. The  
18 objectives of this study were to: (i) understand the impact of hydroclimatic variation on growth  
19 rates using tree-ring width analysis, (ii) assess the magnitude of physiological stress inflicted by  
20 extreme hydroclimatic conditions using tree-ring  $\delta^{13}\text{C}$  measurements, and (iii) evaluate the  
21 relationship between physiological stress and growth inhibition. Growth rates across the landscape  
22 were influenced most strongly by mid-growing season climate, while early-growing season  
23 climate inflicted the greatest physiological stress. Neither growth inhibition nor changes in  $\delta^{13}\text{C}$   
24 values were observed in trees at the wetter site under extreme hydrologic conditions such as  
25 droughts or floods. In addition, trees at the wet site were less sensitive to precipitation and showed

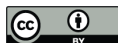

26 no response to higher temperatures. In contrast, trees of the three drier sites experienced growth  
27 inhibition and had higher tree-ring  $\delta^{13}\text{C}$  values during dry periods. Our results indicate higher  
28 physiological resilience in trees growing under wetter conditions. Management and conservation  
29 strategies dependent on site-specific conditions are critical for the health of these wetland forests  
30 under a rapidly changing hydroclimate. This study provides the first dendrochronological baseline  
31 for this region and thresholds of optimum conditions for the growth and health of these forests  
32 which can assist management decisions such as streamflow regulation and conservation plans.

### 33 **1. Introduction**

34 Wetland forests are subjected to drought and floods, both of which can alter productivity  
35 and cause physiological stress in plants (Miao et al., 2009; Vivian et al., 2014). These climate  
36 extremes and warming are predicted to increase in the 21<sup>st</sup> century across southern North America  
37 (Seager et al., 2007). Bottomland hardwood forests, a common wetland forest type, cover a  
38 significant proportion of the floodplains of the rivers and bayous in coastal regions of the  
39 southeastern USA. Along the upper Texas Gulf coast, the lower basins of the Brazos River, San  
40 Bernard River and Colorado River combine to form the Columbia bottomland hardwood forests,  
41 an area of high biodiversity with a critical role in regional hydrology. Large portions of the  
42 Columbia basin forest have been cleared and land cover is now a mix of isolated forest patches,  
43 cropland, and pasture (Griffith, 2004), with only a few larger forest patches remaining (Fig. 1A).  
44 The pre-settlement distribution of these forests was >283,000 ha along a 150 km long corridor  
45 inland from the coast, but has since been reduced to about 72,000 ha (USFWS, 1997; Barrow and  
46 Renne, 2001; Barrow et al., 2005). In the last few decades, this ecosystem has been experiencing  
47 dramatic hydrologic variation caused by severe droughts (Schmidt and Garland, 2012; Hoerling et  
48 al., 2013; Moore et al., 2015) as well as floods (van Oldenborgh et al., 2017; Sebastian et al., 2019),  
49 altering hydrologic conditions over short temporal scales. Annual precipitation amounts have been



50 highly variable with up to 61% more rainfall than average during some years, while up to 53%  
51 deficit during others, in addition to at least five major tropical storms and hurricanes. Rapid  
52 urbanization caused by the proximity to the city of Houston and increasing agricultural activity in  
53 the area have likely altered water cycling significantly in these forests (Kearns et al., 2015; TWDB,  
54 2017). Similar forcing factors have altered the state of most wetland forest types in southeastern  
55 USA.

56 Dendrochronology, the study of tree-rings, has been extensively used to understand the  
57 response of forest growth to changing environmental conditions (Babst et al., 2013; Charney et al.,  
58 2016; Tei et al., 2017). Additionally, tree-ring  $\delta^{13}\text{C}$  is an indirect record of internal leaf  $\text{CO}_2$   
59 concentration, which is controlled by a balance between stomatal conductance and photosynthetic  
60 rate in response to environmental conditions (Farquhar et al., 1989; McCarroll and Loader, 2004;  
61 Gessler et al., 2014), such as temperature, vapor pressure and precipitation (Robertson et al., 1997;  
62 Leavitt et al., 2002). As tree rings are distinguished by their high temporal (annual or sub-annual)  
63 and spatial resolution, regional tree-ring chronologies and  $\delta^{13}\text{C}$  values have the potential to identify  
64 a wide range of growth and stress response of vegetation to hydroclimatic variability. However,  
65 tree-ring  $\delta^{13}\text{C}$  is also influenced by the changing  $\delta^{13}\text{C}$  value of atmospheric  $\text{CO}_2$ . The increase in  
66 atmospheric  $\text{CO}_2$  concentration mainly due to fossil fuel combustion has led to a significant  
67 decrease in  $\delta^{13}\text{C}$  of atmospheric  $\text{CO}_2$  over the last century (Graven et al., 2017). Although this  
68 change is relatively small over short temporal scales, correction methods are available to remove  
69 this signal from tree-ring records when using tree-ring  $\delta^{13}\text{C}$  to understand plant physiological  
70 responses to local conditions (McCarroll and Loader, 2004).

71 Studies conducted across the globe demonstrate growth inhibition signals in the form of  
72 narrow tree-rings in response to drought (Fang et al., 2011; Au and Tardif, 2012; Wang et al.,



73 2017; Gao et al., 2018; Mikac et al., 2018; Szejner et al., 2020). Through these studies, a strong  
74 positive relationship between growth rates and precipitation has been well-established. However,  
75 tree growth is also known to be affected by waterlogging and flooded soils (Astrade and Bégin,  
76 1997; Kozłowski, 1997; St. George, 2014). These effects are more difficult to detect in tree-ring  
77 patterns and therefore very few studies have evaluated growth responses to flooding (Ballesteros-  
78 Canovas et al., 2015; Therrell and Bialecki, 2015; Meko and Therrell, 2020), particularly in  
79 southeastern USA (LeBlanc and Stahle, 2015).

80 Higher  $\delta^{13}\text{C}$  values of tree-ring cellulose usually reflect stress caused by low  
81 environmental moisture at the time of carbon fixation, while lower  $\delta^{13}\text{C}$  values are indicative of  
82 non-stressful growing conditions (Ehleringer et al., 1993; Saurer et al., 1995). Thus,  
83 dendroisotopic approaches combine the advantages of precisely dated and annually resolved tree  
84 rings with the sensitivity of  $\delta^{13}\text{C}$  values governed by ecophysiological responses to the  
85 environment (Gessler et al., 2009; Gessler et al., 2014). However, trees growing in wetland settings  
86 may not respond solely to moisture deficit. Excessive levels of precipitation and prolonged  
87 inundation or saturation in wetland ecosystems can also result in reduced stomatal conductance  
88 and/or increased assimilation rates in trees, resulting in high  $\delta^{13}\text{C}$  values; however, this effect is  
89 highly variable across species (Stuiver et al., 1984; Ewe and Sternberg, 2002; Ewe and Sternberg,  
90 2003; Anderson et al., 2005; Buhay et al., 2008). These studies in wetlands attribute this positive  
91 relationship between  $\delta^{13}\text{C}$  and precipitation to excess water stress. Although debatable, a number  
92 of possible mechanisms have been suggested with significant evidence to support this relationship.  
93 These include disruption of water and nutrient uptake due to anoxic conditions in the root zone  
94 (Jackson and Drew, 1984), lowered root hydraulic conductivity (Davies and Flore, 1986),



95 increased abscisic acid concentrations (Kozłowski and Pallardy, 1984) and accumulation of  
96 metabolic toxins from flooding (Jackson and Drew, 1984).

97 In this study, we investigated how bottomland hardwood wetland forests of eastern Texas,  
98 USA respond to hydroclimatic variation and extremes under different edaphic conditions. The  
99 study was conducted at four sites, of which one was a frequently flooded wet site, while at the  
100 other three sites waterlogging and surface flooding were much less frequent and more ephemeral.  
101 Our first objective was to understand how growth rates are affected by hydroclimatic variation  
102 using tree-ring width analysis in water oak (*Quercus nigra* L.), a dominant species in the Columbia  
103 bottomland hardwood forest. We hypothesized that at relatively drier sites, trees have lower growth  
104 rates on average over long time scales compared to wetter sites. Periods of higher rainfall will be  
105 associated with increases in growth. However, in extremely wet conditions, at frequently  
106 waterlogged sites, trees will show a decline in growth caused by flooding and hypoxic conditions.  
107 Our second objective was to assess the magnitude of physiological stress inflicted by hydroclimatic  
108 conditions on these forests. We hypothesized that tree-ring  $\delta^{13}\text{C}$  in trees growing under relatively  
109 drier soil conditions will decrease during periods of higher rainfall. In contrast, the opposite trend  
110 is expected at wetter sites where increasing moisture would induce flooding stress. In addition, we  
111 hypothesized that trees growing where waterlogging is common are less stressed during dry  
112 periods than those at the drier sites because of slower depletion of soil water reserves. Our third  
113 objective was to evaluate the relationship between physiological stress and growth inhibition.  
114 Although a negative relationship between stress (tree-ring  $\delta^{13}\text{C}$ ) and growth (tree-ring width) is  
115 expected in this study, the strength of this relationship could vary with site conditions. Given that  
116 water oaks are moderately tolerant of flooding, and dry conditions are also common in this  
117 ecosystem, we hypothesized that drought stress had a stronger effect on growth than flooding



118 stress. Thus, we expected a stronger negative relationship between growth and physiological stress  
119 at drier sites.

## 120 2. Materials and Methods

### 121 2.1 Study Area Description

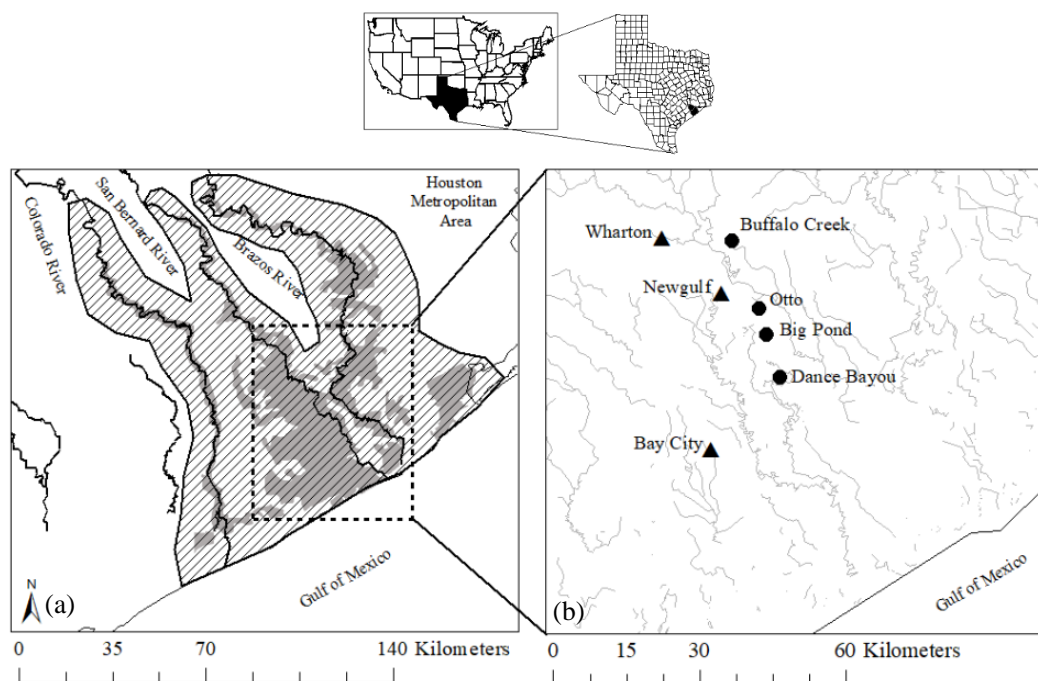

122 **Figure 1. a) Current distribution of Columbia Bottomlands (grey) and historic extent**  
123 **shown by the slanted parallel lines (USFWS, 1997; Houston Wilderness, 2007; Rosen et al.,**  
124 **2008). The area in which the study sites are located is shown by the dashed box. b)**  
125 **Locations of study sites (circles) and weather stations (triangles) in the Brazos-Colorado**  
126 **Coastal Basin.**

127  
128 The study was conducted at four different sites located within the Brazos-Colorado Coastal  
129 Basin in the San Bernard National Wildlife Refuge, Brazoria and Fort Bend Counties, Texas. The  
130 four sites are Dance Bayou (DB), Big Pond (BP), Otto (OT) and Buffalo Creek (BC) (Fig. 1B;  
131 Table 1). Site DB was observed to be flooded most frequently after significant rain events from  
132 2016 to 2019. This site also remained waterlogged for prolonged periods, unlike the other three



133 sites. Therefore, we refer to this site as the “wet site”. The sites are located in Ecoregion III Western  
134 Gulf Coastal Plain and Ecoregion IV Floodplain and Low Terraces, dominated by mixed  
135 bottomland hardwood forests (Griffith, 2004) at an elevation of about 16 m above MSL. Dominant  
136 tree species at these sites include *Quercus nigra* L. (water oak), *Quercus fusiformis* Small (live  
137 oak), *Celtis laevigata* Willd. (sugarberry) and *Triadica sebifera* (L.) Small (Chinese tallow). The  
138 climate of this region is classified as Humid Subtropical (Cfa) under the Köppen–Geiger climate  
139 classification system (Koppen, 1900). The average maximum monthly temperature is  
140 approximately 26 °C and the average minimum monthly temperature is approximately 15 °C. Mean  
141 annual rainfall is 1143 mm, with an average relative humidity of ~70% (NOAA, 2018). The sites  
142 are located in the Linnville Bayou watershed of the San Bernard River Basin. As these forests are  
143 situated in the floodplain, sloughs are a common occurrence and inundate significant parts of the  
144 forest. Streamflow in Linnville Bayou and adjoining streams and sloughs that traverse the four  
145 sites is driven by at least 7 dams on the San Bernard River with heights ranging from 2.5-7.5 m  
146 (NID, 2020). Therefore, the presence of these dams and their varying discharge into Linnville  
147 Bayou adds significant complexity to the hydrology of Columbia Bottomlands in addition to an  
148 already fluctuating hydroclimate.

149 Soils are mainly vertisols and alfisols dominated by clay, loam and sandy loam texture (NRCS,  
150 2020). The soils series include Aris fine sandy loam, Bacliff clay, Edna loam, Leton loam, Pledger  
151 Clay and Churnabog clay.

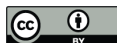

152 **Table 1.** Site description with basic soil properties averaged over the top 100 cm depth (NRCS,  
153 2020).  
154

| Site | Elevation (m) | Coordinates                    | Tree DBH (cm) (mean ± SE) | Clay % | Silt % | Sand % | Soil pH | Bulk Density (g/cm <sup>3</sup> ) | Organic Matter (%) |
|------|---------------|--------------------------------|---------------------------|--------|--------|--------|---------|-----------------------------------|--------------------|
| DB   | 13            | 29°7'9.56" N<br>95°47'4.24" W  | 48.3 ± 5.6                | 33     | 58     | 9      | 7.4     | 1.37                              | 1.7                |
| BP   | 16            | 29°9'56.66"N<br>95°49'43.34"W  | 58.5 ± 3.2                | 71     | 28     | 1      | 7.1     | 1.12                              | 4.8                |
| OT   | 17            | 29°10'47.76"N<br>95°50'28.65"W | 56.4 ± 4.7                | 71     | 28     | 1      | 7.1     | 1.12                              | 4.8                |
| BC   | 26            | 29°19'21.75"N<br>95°51'47.01"W | 51.7 ± 3.8                | 55     | 34     | 11     | 7.8     | 1.20                              | 2.2                |

## 155 2.2 Tree core sampling

156 We sampled at least eight mature *Q. nigra* trees at each site in May 2017. Healthy  
157 individuals with no obvious injuries like cavities, scars or diseases were selected. Preference was  
158 given to trees with larger diameters at breast height (>40 cm) and uniform girth (Stokes and  
159 Smiley, 1968). Three cores were extracted at breast height from every tree spaced equally around  
160 the circumference. Two cores were processed and used for ring-width measurements and the third  
161 core was used for  $\delta^{13}\text{C}$  analysis after cellulose extraction.

## 162 2.3 Dendrochronology

163 Tree cores were dried to constant weight at 60 °C and mounted on 9.5 x 9.5 mm grooved  
164 core mounts. The mounted cores were sanded using a hand sander with progressively finer grades  
165 of sandpaper (60 to 400 grit) (Speer, 2012). Tree-ring widths were visually crossdated and then  
166 measured using MeasureJ2X linked to a sliding-stage microscope (2.5X). To verify and refine the  
167 crossdating, tree-ring widths were statistically assessed using the COFECHA program (Holmes,  
168 1983). Series intercorrelation and mean sensitivity obtained from COFECHA were used to  
169 determine the quality of crossdating (Grissino-Mayer, 2001; Speer, 2012). Series intercorrelation  
170 indicates core-to-core variation in annual growth rates within a given chronology, while mean





171 sensitivity indicates if the variation in annual growth rates from year-to-year is sensitive enough  
172 for dendroclimatology analysis. This crossdating was done separately for each site as well as on  
173 pooled raw tree-ring widths from all sites. The final standardized (A) chronology (Ring-width  
174 index) was generated for each site using ARSTAN, which mathematically standardizes tree-ring  
175 series by controlling the autocorrelation component in the time series and maximizes the climate  
176 signal (Cook and Holmes, 1984; Speer, 2012).

#### 177 **2.4 Climate Data**

178 Daily climate summaries for 1950-2016 from three weather stations (Bay City, Newgulf  
179 and Wharton, Texas, USA, Fig. 1B) and Palmer Drought Severity Index (PDSI) for the Texas  
180 Upper Coast Division were collected from the NOAA NCEI database (NOAA, 2018). Monthly  
181 and annual averages were used for analysis. As the three weather stations are located at equal  
182 distances from the sites (<25 km) and the measurements are highly correlated, an average of the  
183 three records was used for dendroclimatology analysis. Monthly average  $\delta^{13}\text{C}$  values of  
184 atmospheric  $\text{CO}_2$  from La Jolla Pier, California, USA were obtained from the Scripps  $\text{CO}_2$   
185 Program and annual averages were calculated (Keeling and Keeling, 2017).

#### 186 **2.5 Tree-ring $\delta^{13}\text{C}$ analysis**

187 Tree cores not utilized for ring-width analyses were hand-sanded using a sandpaper (220  
188 grit) to enhance ring-visibility. Tree-rings were selected from years with a wide range of  
189 precipitation to cover the maximum breadth of the dry-wet hydroclimatic spectrum (235-1120  
190 mm/year). Selected tree-rings were precisely excised using an X-Acto knife. For  $\delta^{13}\text{C}$  analysis,  $\alpha$ -  
191 cellulose was extracted from the tree-rings using a slightly modified version of the Jayme-Wise  
192 Method (Green, 1963), in which a Soxhlet extraction assembly is used (Leavitt and Danzer, 1993;  
193 Cullen and Macfarlane, 2005).  $\delta^{13}\text{C}$  in tree-ring  $\alpha$ -cellulose was analyzed using a Costech ECS



194 4010 elemental analyzer (Costech Analytical Technologies, Valencia, CA, USA) interfaced with  
195 a Delta V Advantage isotope ratio mass spectrometer (Delta V, ThermoFisher Scientific, Waltham,  
196 MA, USA) operating in continuous flow mode in the Stable Isotopes for Biosphere Science (SIBS)  
197 Lab, Texas A&M University (College Station, TX, USA). Carbon isotope ratios are presented in  
198  $\delta$  notation:

$$199 \quad \delta = \left[ \frac{R_{SAMPLE} - R_{STD}}{R_{STD}} \right] * 10^3 \quad (1)$$

200 where  $R_{SAMPLE}$  is the  $^{13}\text{C}/^{12}\text{C}$  ratio of the sample and  $R_{STD}$  is the  $^{13}\text{C}/^{12}\text{C}$  ratio of the V-PDB  
201 (Vienna Pee Dee Belemnite) standard (Coplen, 1995). Duplicate measurements taken after every  
202 10 measurements yielded a precision of  $\pm 0.1\%$ .

203 Atmospheric  $\delta^{13}\text{C}$  depletion trend over the study period was removed from the tree-ring  
204  $\delta^{13}\text{C}$  record by calculating the difference between average annual atmospheric  $\delta^{13}\text{C}$  values  
205 (Keeling and Keeling, 2017) and a standard value ('pre-industrial' value of  $-6.4\%$ ) (Francey et  
206 al., 2002). The difference is denoted by  $\Delta$ . Yearly  $\Delta$  values were then added to tree-ring  $\delta^{13}\text{C}$   
207 values from corresponding years (McCarroll and Loader, 2004) (Table 2).

208 **Table 2:** Annual average atmospheric  $\delta^{13}\text{C}$  values and yearly correction factor ( $\Delta$ ).

| Year | $\delta^{13}\text{C}$ | $\Delta$ | Year | $\delta^{13}\text{C}$ | $\Delta$ | Year | $\delta^{13}\text{C}$ | $\Delta$ |
|------|-----------------------|----------|------|-----------------------|----------|------|-----------------------|----------|
| 1986 | -7.70                 | 1.30     | 1997 | -8.02                 | 1.62     | 2008 | -8.34                 | 1.94     |
| 1987 | -7.77                 | 1.37     | 1998 | -8.11                 | 1.71     | 2009 | -8.32                 | 1.92     |
| 1988 | -7.87                 | 1.47     | 1999 | -8.13                 | 1.71     | 2010 | -8.36                 | 1.96     |
| 1989 | -7.87                 | 1.47     | 2000 | -8.10                 | 1.70     | 2011 | -8.38                 | 1.98     |
| 1990 | -7.89                 | 1.49     | 2001 | -8.11                 | 1.71     | 2012 | -8.43                 | 2.03     |
| 1991 | -7.92                 | 1.52     | 2002 | -8.14                 | 1.74     | 2013 | -8.47                 | 2.07     |
| 1992 | -7.91                 | 1.51     | 2003 | -8.23                 | 1.83     | 2014 | -8.51                 | 2.11     |
| 1993 | -7.89                 | 1.49     | 2004 | -8.24                 | 1.84     | 2015 | -8.51                 | 2.11     |
| 1994 | -7.95                 | 1.55     | 2005 | -8.26                 | 1.86     | 2016 | -8.59                 | 2.19     |
| 1995 | -8.01                 | 1.61     | 2006 | -8.33                 | 1.93     |      |                       |          |
| 1996 | -8.03                 | 1.63     | 2007 | -8.34                 | 1.94     |      |                       |          |

209

## 210 2.6 Statistical Analyses



211 To evaluate differences in mean  $\delta^{13}\text{C}$  values between sites, we used one-way ANOVA.  
212 Levene's test was used to check for equal variances, normality was tested using Shapiro-Wilk test  
213 and post-hoc analysis was conducted using Tukey HSD. Total monthly precipitation was  
214 calculated from daily summaries. Daily maximum temperatures for each day of the month were  
215 used to compute mean monthly maximum temperature. Monthly PDSI values were used directly  
216 as obtained. To identify the portion of the growing season that has the strongest influence on  
217 growth and  $\delta^{13}\text{C}$ , we used simple linear regressions between site-wise annual ring-width index and  
218  $\delta^{13}\text{C}$  against monthly precipitation, mean monthly maximum temperature and monthly PDSI for  
219 all months of the same year as well as the previous year. Additionally, to estimate the multi-month  
220 influence of early, late and overall growing season climate on growth and  $\delta^{13}\text{C}$ , we averaged  
221 monthly climate data over progressively longer periods of up to 8 months within the growing  
222 season. We conducted additional linear regression on these calculated means against annual ring-  
223 width index and  $\delta^{13}\text{C}$ . The time interval during which climate was found to be most strongly  
224 influencing growth and  $\delta^{13}\text{C}$  (maximum coefficient of determination) was used for  
225 dendroclimatology analysis. To understand the relationship between growth and stress, we also  
226 used linear regression between site-wise annual ring width index and  $\delta^{13}\text{C}$ . All statistical analyses  
227 were conducted in R (R Core Team, 2012).

### 228 3. Results

#### 229 3.1 Site chronologies

230 Site-level tree-ring width chronologies were closely related to precipitation trends. Patterns  
231 of annual growth rate were similar between sites for much of the 40-year period, except a few wet  
232 years (1991, 1992, 1997, 2001, 2003 and 2007) (Fig. 2). The divergent responses to these wet  
233 years apparently reduced the pooled series intercorrelation (Table 3). Hence, this multi-site  
234 chronology was not used for further analyses. High series intercorrelation for the drier sites

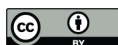

235 indicates lower tree-to-tree differences at these sites, as compared to our wettest site, DB, which  
 236 had a slightly lower series intercorrelation (Table 3). All site-level chronologies were found to be  
 237 sensitive enough for dendroclimatological analysis as mean sensitivity, which is a measurement  
 238 of year-to-year variability in annual growth, fell within an acceptable range. Forest stands at sites  
 239 DB and OT were found to be younger (27 years) than the other two sites (40 years) as indicated  
 240 by the mean series lengths (Table 3).

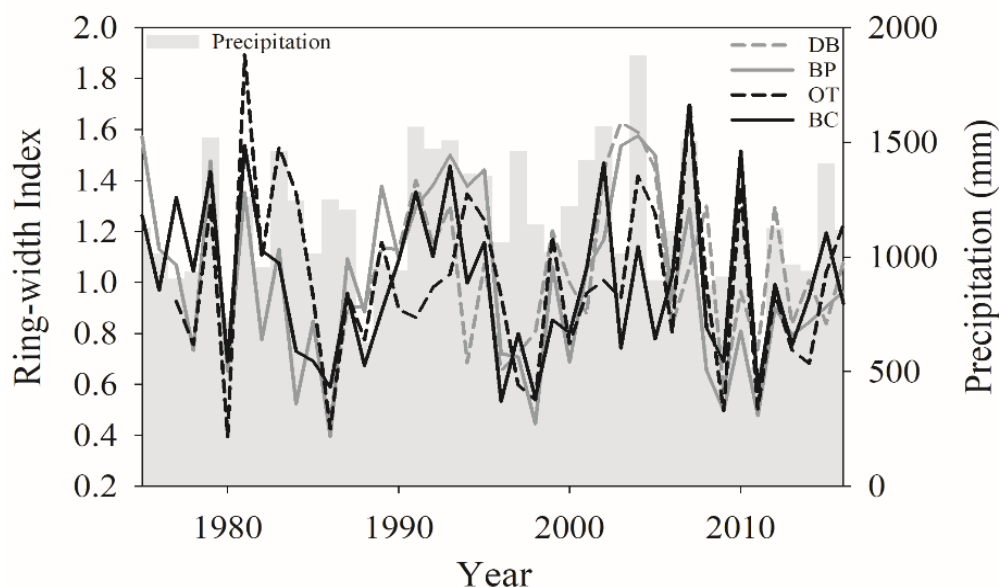

241  
 242 **Figure 2.** Temporal variation in ring-width index of *Quercus nigra* within the Brazos-Colorado  
 243 Coastal Basin of Texas. Total annual precipitation is shown by grey shading.  
 244

245 **Table 3.** Descriptive statistics of site-level as well as combined tree-ring chronologies generated  
 246 using COFECHA.

| Chronology | Number of trees | Number of dated series | Series Intercorrelation | Mean Sensitivity | Mean Series Length |
|------------|-----------------|------------------------|-------------------------|------------------|--------------------|
| All sites  | 32              | 64                     | 0.31                    | 0.37             | 33 years           |
| DB         | 8               | 16                     | 0.52                    | 0.35             | 27 years           |
| BP         | 8               | 16                     | 0.74                    | 0.36             | 40 years           |
| OT         | 8               | 16                     | 0.78                    | 0.42             | 27 years           |
| BC         | 8               | 16                     | 0.77                    | 0.37             | 38 years           |

247



### 248 3.2 Differences in site-level tree-ring $\delta^{13}\text{C}$ values

249 Comparison between site-level mean tree-ring  $\delta^{13}\text{C}$  measurements averaged over the entire  
250 40-year study period supports our second hypothesis. Tree-ring  $\delta^{13}\text{C}$  measurements were different  
251 between sites when averaged over the 40-year period [One-way ANOVA,  $F(3, 24) = 4.05$ ,  $p =$   
252  $0.01$ ]. This indicates that at least one site has a significantly different mean  $\delta^{13}\text{C}$  signal over the  
253 40-year period. Post hoc analysis indicates that the wet site, DB, had a lower mean tree-ring  $\delta^{13}\text{C}$   
254 value as compared to two drier sites, BP ( $p=0.03$ ) and OT ( $p=0.02$ ) (Fig. 3).

255

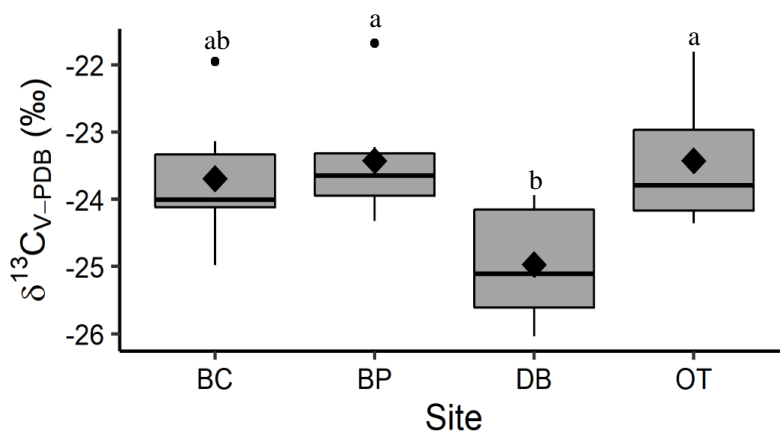

256 **Figure 3.** One-way ANOVA and Tukey post hoc analysis (denoted with letters) for mean  
257 difference in site-level tree-ring  $\delta^{13}\text{C}$  averaged over the 40-year period. Black diamonds indicate  
258 mean values, horizontal black lines indicate median values, black circles indicate outliers and grey  
259 boxes show values lying between the upper and lower quartiles.

260

### 261 3.3 Dendroclimatology analysis

262 Comparisons between ring-width index and climate data reveal that growth rates are most  
263 strongly influenced by mid-growing season climate (May-July precipitation and maximum  
264 temperatures; July PDSI) (Table S1). Since a larger proportion of annual growth occurs during the  
265 mid-growing season, higher rainfall and lower maximum temperatures during this period strongly  
266 drive annual growth rates. Similar comparisons between tree-ring  $\delta^{13}\text{C}$  measurements and climate



267 data indicate that climatic conditions early in the growing season (April) are critical for causing  
268 physiological stress in these forests (Table S2).

269 As hypothesized, we observed a strong increase in tree-ring widths with mid-growing  
270 season precipitation. Although this positive relationship was expected for trees growing in drier  
271 conditions, we observed a similar but weaker positive relationship between growth and  
272 precipitation even at the wet site (Table 4). We had hypothesized that at extremely wet conditions,  
273 growth rates at the wet site would decline due to flood stress, however, no such decline was  
274 observed even during extremely wet phases (Fig. 4a). Drought conditions and maximum  
275 temperatures during the mid-growing season result in decreasing growth at the drier sites, but not  
276 at the wet site, as expected (Table 4; Fig. 4b, c).

277 **Table 4.** Relationships between ring-width index and mid-growing season climatic conditions  
278 ( $\alpha=0.05$ ).  
279

| Site | Precipitation (May-July) |                | Temperature (May-July) |                | PDSI (July) |                |
|------|--------------------------|----------------|------------------------|----------------|-------------|----------------|
|      | p value                  | R <sup>2</sup> | p value                | R <sup>2</sup> | p value     | R <sup>2</sup> |
| DB   | <0.05                    | 0.13           | ns                     | -              | ns          | -              |
| BP   | <0.001                   | 0.39           | <0.001                 | 0.25           | <0.001      | 0.49           |
| OT   | <0.001                   | 0.42           | <0.01                  | 0.17           | <0.001      | 0.31           |
| BC   | <0.001                   | 0.44           | <0.001                 | 0.27           | <0.001      | 0.47           |



280

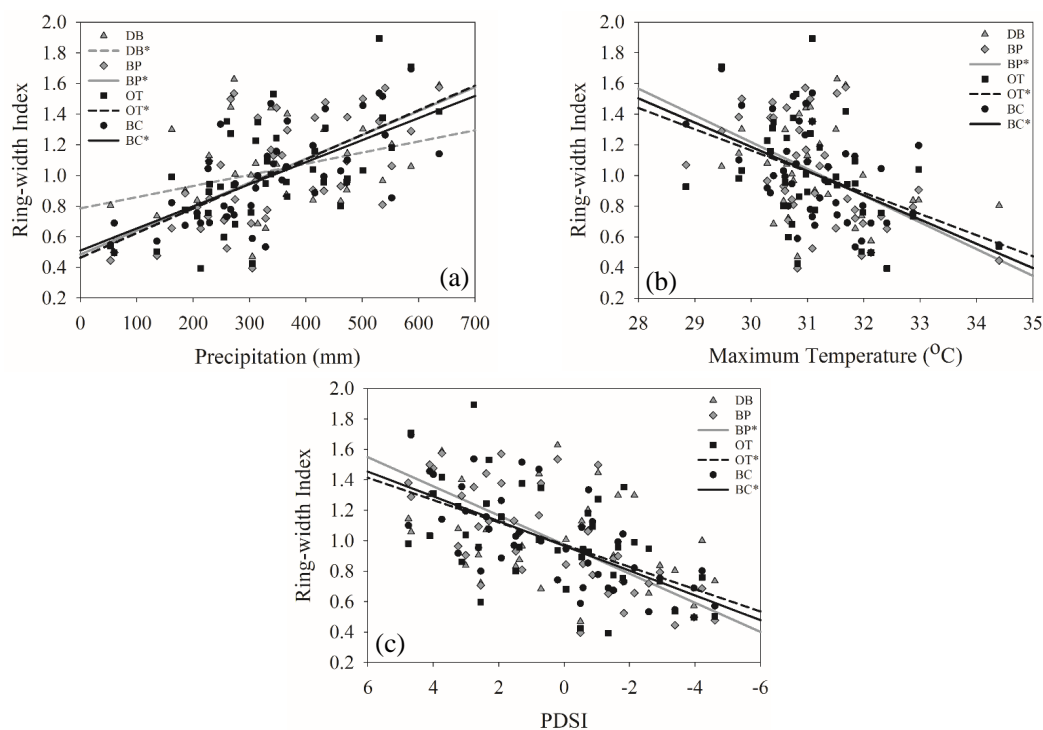

281 **Figure 4.** a) Relationship between ring-width index and mid-growing season precipitation (a),  
282 temperature (b) and PDSI (c). Site DB is represented by grey triangles, BP by grey diamonds, OT  
283 by black squares and BC by black circles. Statistically significant relationships are marked with  
284 an asterisk (\*).

285 In line with our second hypothesis, we observed a depletion in tree-ring  $\delta^{13}\text{C}$  values with  
286 increase in early-growing season precipitation at the drier sites (Table 5, Fig. 5a). We had  
287 hypothesized that high precipitation at the wet site will enrich tree-ring  $\delta^{13}\text{C}$  values as a result of  
288 physiological stress caused by possible flooding stress. However, we found no relationship  
289 between tree-ring  $\delta^{13}\text{C}$  and precipitation at the wet site (Table 5). Higher maximum temperatures  
290 resulted in enriched tree-ring  $\delta^{13}\text{C}$  values only at one of the drier sites (BC), indicating  
291 physiological resistance to high temperatures in most parts of this wetland forest (Table 5, Fig.  
292 5b). PDSI did not have any effect on tree-ring  $\delta^{13}\text{C}$  values from all four sites (Table 5). Also,  
293 previous year's climate did not have any statistically significant influence on either ring-width  
294 index or tree-ring  $\delta^{13}\text{C}$  measurements at any site.



295 **Table 5.** Relationships between tree-ring  $\delta^{13}\text{C}$  values and early-growing season climatic conditions  
 296 ( $\alpha=0.05$ ).

| Site | Precipitation (April) |                | Temperature (April) |                | PDSI<br>p value |
|------|-----------------------|----------------|---------------------|----------------|-----------------|
|      | p value               | R <sup>2</sup> | p value             | R <sup>2</sup> |                 |
| DB   | ns                    | -              | ns                  | -              | ns              |
| BP   | <0.05                 | 0.70           | ns                  | -              | ns              |
| OT   | <0.05                 | 0.68           | ns                  | -              | ns              |
| BC   | <0.05                 | 0.59           | <0.001              | 0.94           | ns              |

297

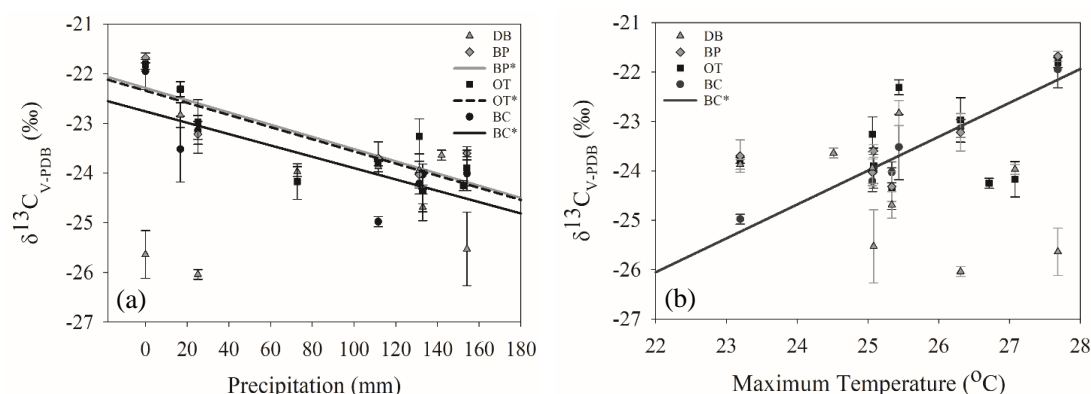

298 **Figure 5.** Relationship between tree-ring  $\delta^{13}\text{C}$  values and early-growing season (a) precipitation  
 299 and (b) temperature. Site DB is represented by grey triangles, BP by grey diamonds, OT by black  
 300 squares and BC by black circles. Statistically significant relationships are marked with an asterisk  
 301 (\*).

### 302 3.4 Relationship between growth and tree-ring $\delta^{13}\text{C}$

303 The comparison between tree-ring  $\delta^{13}\text{C}$  values and tree-ring width from corresponding years  
 304 supports our third hypothesis only at the drier sites. Ring-width index was correlated with  $\delta^{13}\text{C}$   
 305 values only at sites OT ( $p<0.05$ ;  $R^2=0.53$ ) and BC ( $p<0.05$ ;  $R^2=0.58$ ). Tree-ring  $\delta^{13}\text{C}$  values were  
 306 not correlated with annual growth at the wet site DB, which indicates that trees at this site were  
 307 able to sustain their growth rates even during stressful conditions (Fig. 6).



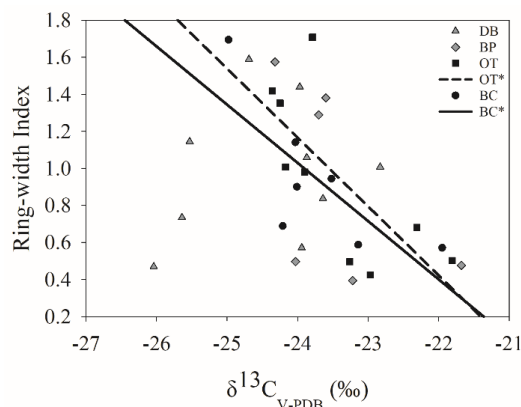

308

309 **Figure 6.** Relationship between ring-width index and tree-ring  $\delta^{13}\text{C}$ . Site DB is represented by  
310 grey triangles, BP by grey diamonds, OT by black squares and BC by black circles. Statistically  
311 significant relationships are marked with an asterisk (\*).  
312

312

#### 313 4. Discussion

314 Bottomland hardwood forests in the southeastern United States have been reduced to a  
315 small proportion of their original expanse. The hydrology of these wetland forests has been altered  
316 due to expansion of agricultural and urban land uses, river regulation, drainage ditches,  
317 impoundment from berms and poor drainage, and water table drawdowns (Wear and Greis, 2002;  
318 Blann et al., 2009; Dahl, 2011). The ecological impacts of these disturbances are exacerbated by  
319 hydroclimatic anomalies such as droughts and floods (Ferrati et al., 2005; Erwin, 2008). Changing  
320 climatic conditions are not only resulting in increasingly drier conditions over time, but also more  
321 intense storm events (Easterling et al., 2000; Seager et al., 2007; Knutson et al., 2010). Moreover,  
322 fragmentation caused by anthropogenic pressures coupled with topographic heterogeneity causes  
323 this **dry-wet transition** to not only be temporally but also spatially variable. As a result, portions of  
324 these riverine wetland forests tend to be drier than others. These temporal and spatial variations  
325 need to be considered while studying the impacts of changing hydroclimate and hydrology on  
326 plants in such ecosystems.



327            Contrary to our first hypothesis, similar annual growth rates of trees at the wetter site and  
328 the three drier sites during the past several decades suggests that trees at all sites have access to  
329 moisture sufficient to sustain annual growth. Moreover, growth of trees at the wetter site was not  
330 inhibited by excessive moisture during wet years, which may reflect adaptation by *Quercus nigra*  
331 to the broad range of soil moisture conditions that occur in a floodplain forest (Gilman et al., 1994).  
332 Within the wetter site, we observed more heterogeneity in growth rates, which could be attributed  
333 to uneven waterlogging within the site. Although growth rates were correlated with rainfall across  
334 all sites, the wet site had a much weaker dependence on rainfall and showed no negative response  
335 to higher temperatures and drought severity. This suggests that wetland forests with high water  
336 tables are more independent of climatic conditions than their drier counterparts. It has been  
337 repeatedly observed across southeastern US that in wetter and hydrologically well-connected parts  
338 of wetland forests, vegetation is more physiologically resilient and experiences lower stress during  
339 non-favorable growing conditions (Clawson et al., 2001; Anderson et al., 2005; Gee et al., 2014;  
340 Allen et al., 2016).

341            Consistent with our second hypothesis, mean tree-ring  $\delta^{13}\text{C}$  values from the wetter site  
342 were significantly lower than those from the drier sites over a longer temporal scale, suggesting  
343 lower physiological stress and higher resilience of trees at the wet site as compared to those at the  
344 drier sites. Also supporting our second hypothesis, reduced stomatal conductance in trees from the  
345 drier site during drought years, clearly indicates prolonged stress caused by soil moisture deficit.  
346 This relationship between tree-ring  $\delta^{13}\text{C}$  and drought conditions (low precipitation and high  
347 temperatures) has been extensively observed across different ecosystems such as boreal forests  
348 (Brooks et al., 1998; Au and Tardif, 2012), wetlands (Anderson et al., 2005; Buhay et al., 2008),  
349 lowland rain forests (Schollaen et al., 2013), deserts (Lipp et al., 1996), etc. It is important to note



350 that in parts of these forested wetlands, dry conditions can develop and cause stressful conditions  
351 for the vegetation.

352 Our third hypothesis that physiological stress would have a negative relationship with  
353 growth holds true under dry edaphic conditions, where stress restricts plant growth. Contrastingly,  
354 in trees growing in wetter soils, stress and growth are largely decoupled. At the drier sites, drought-  
355 related enriched tree-ring  $\delta^{13}\text{C}$  values are correlated with slower growth rates, which indicates that  
356 moisture deficit causes physiological stress in these trees, resulting in growth inhibition. The  
357 absence of drought-related stress signals at the wet site is possibly due to supplemental soil  
358 moisture availability from flooding and higher physiological resistance. Additionally, decoupling  
359 between growth and stress signals from the wet site indicate that physiological stress does not  
360 always result in growth inhibition in wetland trees, especially when optimum moisture is available.  
361 A similar relationship has been observed in pond cypress trees in the southeastern Everglades,  
362 Florida, USA (Anderson et al., 2005). This decoupling between stress signals and growth rates  
363 seems to be more common in wetlands with prolonged waterlogging. It has been suggested that  
364 wetland species that experience frequent flooding develop adaptive traits that enable rapid  
365 reopening of stomata with the recession of flood waters as oxygen availability in the root zone  
366 increases (Crawford, 1982; Kozłowski and Pallardy, 1984; Kozłowski, 2002). As a result, growth  
367 may not be inhibited even though stress signals related to stomatal closure due to flooding are  
368 detected in the same tree-ring. Consistent with this, our observations signify that trees growing in  
369 drier conditions do have a more distinct stress-growth relationship as compared to those growing  
370 in wet conditions.

371 We found that mid-growing season precipitation (from May to July) is most critical for  
372 growth in this landscape. Similarly, high temperatures during the same period were associated with



373 suppressed growth. Therefore, adequate precipitation and moderate temperatures during this  
374 period are important controls over tree growth. However, due to changing climatic conditions and  
375 altered hydrology of this region, change in the moisture availability during this period can be  
376 severely detrimental to this ecosystem. Unlike the trees growing in drier conditions, the ones at  
377 the wet site are not affected by temperature and drought severity throughout the growing season  
378 possibly because of residual soil moisture availability despite evaporation caused by higher  
379 temperatures. It is important to consider seasonal variation in precipitation because flood  
380 conditions in the dormant winter season do not necessarily help sustain growth throughout the  
381 summer in drier sites, especially if summers have below normal precipitation. On the other hand,  
382 trees at the wet site may benefit from access to soil moisture reserves from waterlogging caused  
383 by winter precipitation.

384         While the growth-climate relationship is more amplified during mid-growing season, stress  
385 signals are more prominently dependent on early-growing season precipitation. Lack of  
386 precipitation early in the growing season (April) results in substantial physiological stress in trees  
387 at the drier sites. This is an indication that although dry conditions early in the growing season  
388 cause stress in trees, most growth is attained during the mid-growing season. Therefore, trees can  
389 recover from the stress and attain normal growth rates if adequate precipitation occurs during the  
390 mid-growing season. The prominent dependence of physiological stress on spring precipitation  
391 could be the result of more energy and resource allocation during leaf out. However, this holds  
392 true only under dry edaphic conditions. Such seasonal variations have been observed across  
393 different biomes and have been attributed to formation of wood using previous or current growing  
394 season assimilates (Schollaen et al., 2013). It is apparent that if wood at the very beginning of the  
395 growing season is formed using assimilates from the previous growing season, tree-ring  $\delta^{13}\text{C}$  does



396 not have a correlation with early-growing season precipitation from the current year (Helle and  
397 Schleser, 2004; Porter et al., 2009; Schollaen et al., 2013). However, like in our study, when tree-  
398 ring  $\delta^{13}\text{C}$  is well-correlated with precipitation from early-growing season, it indicates formation of  
399 wood using assimilates from the current growing season. To confirm this relationship, we  
400 compared our ring-width index and tree-ring  $\delta^{13}\text{C}$  values with previous years' climate and found  
401 no correlation.

402 Columbia bottomlands occur at the extreme southwestern edge of the bottomland  
403 hardwood forest type (Bray, 1906; Putnam et al., 1960), which is also the southwestern edge of  
404 the distribution of *Q. nigra* and many other wetland tree species. Consequently, the *Q. nigra*  
405 populations examined in this study experience the driest and warmest conditions found throughout  
406 its geographic range. Edges of distribution ranges usually experience harsher environmental  
407 conditions as compared to the range core (Rehm et al., 2015). Therefore, range-edge populations  
408 are more resilient and are better adapted to survive in stressful conditions relative to core  
409 populations (Gutschick and Hormoz, 2003). Climate models have predicted a significant decrease  
410 in precipitation and increase in temperature throughout Texas (Jiang and Yang, 2012) and  
411 especially in the Brazos River basin (Awal et al., 2016) where this population occurs. As climate  
412 changes, these native wetland tree populations will play key roles in helping the species maintain  
413 their geographic distributions.

## 414 5. Conclusion

415 This study provides insights on hydroclimatic conditions that can provide suitable  
416 conditions for better wetland forest productivity and health. Columbia bottomlands support a large  
417 diversity of plants, mammals, birds, reptiles and insects. The knowledge of optimum growing  
418 conditions for the vegetation in this region is critical for the survival and conservation of the



419 biodiversity that is dependent on this ecosystem. We provide evidence that wetter portions of this  
420 landscape are more resilient to hydroclimatic changes than drier areas, as well as better adapted to  
421 periods of flooding and waterlogging. Trees in drier areas grew more slowly during dry and warm  
422 periods and were more sensitive to seasonal physiological stress. We observed variation in growth  
423 and stress responses to climatic conditions during different phases of the growing season. Our  
424 findings suggest that hydroclimatic changes to this ecosystem that alter the timing and frequency  
425 of wet conditions can negatively impact forest health. This study also provides the first tree-ring  
426 records from the Columbia bottomlands, which can act as a baseline for future ecological research  
427 in the region.

428 *Data availability.* All data resulting from this study are available from the authors upon request  
429 (ajinkyagd@tamu.edu).

430

431 *Competing interests.* The authors declare that they have no conflict of interest.

432

433 *Author contribution.* Ajinkya G. Deshpande conceptualized the study, developed the methodology,  
434 collected field samples, conducted formal analysis including laboratory and statistical analysis and  
435 wrote the original draft. Thomas W. Boutton contributed in conceptualization of the study,  
436 provided laboratory equipment/materials for stable carbon isotope analysis and edited/reviewed  
437 the original draft. Charles W. Lafon contributed in conceptualization of the study, provided all the  
438 required equipment for dendrochronology and edited/reviewed the original draft. Georgianne W.  
439 Moore was the investigator and supervisor of the study, played a major role in conceptualization  
440 of the study, contributed in developing the methodology as well as statistical analyses, acquired  
441 funds for the study and edited/reviewed the original draft.

442

443 *Acknowledgements.* This study is funded by the Texas A&M University Research Development  
444 Fund, by USDA/NIFA Hatch Project 1020427, and by the Sid Kyle Endowed Chair in the  
445 Department of Ecology and Conservation Biology at Texas A&M University. The authors are  
446 thankful to Dr. Parveen Chhetri, Dr. Ayumi Hyodo and the entire Texas Water Observatory team  
447 for supporting this study. We would also like to thank Jennifer Sanchez and Curtis Jones from  
448 the U.S. Fish and Wildlife Service, San Bernard National Wildlife Refuge (Permit No. 17-0005).

449

## 450 **References**

451 Allen, S. T., Krauss, K. W., Cochran, J. W., King, S. L., and Keim, R. F.: Wetland tree transpiration  
452 modified by river-floodplain connectivity, *Journal of Geophysical Research G: Biogeosciences*,  
453 121, 753-766, <https://doi.org/10.1002/2015JG003208>, 2016.



- 454 Anderson, W. T., Sternberg, L. S. L., Pinzon, M. C., Gann-Troxler, T., Childers, D. L., and Duever,  
455 M.: Carbon isotopic composition of cypress trees from South Florida and changing hydrologic  
456 conditions, *Dendrochronologia*, 23, 1-10, <https://doi.org/10.1016/j.dendro.2005.07.006>, 2005.
- 457 Astrade, L., and Bégin, Y.: Tree-ring response of *Populus tremula* L. and *Quercus robur* L. to  
458 recent spring floods of the Saône River, France, *Écoscience*, 4, 232-239,  
459 <https://doi.org/10.1080/11956860.1997.11682400>, 1997.
- 460 Au, R., and Tardif, J. C.: Drought signals inferred from ring-width and stable carbon isotope  
461 chronologies from *Thuja occidentalis* trees growing at their northwestern distribution limit, central  
462 Canada, *Canadian Journal of Forest Research*, 42, 517-531, <https://doi.org/10.1139/x2012-012>,  
463 2012.
- 464 Awal, Bayabil, K. H., and Fares, A.: Analysis of potential future climate and climate extremes in  
465 the Brazos Headwaters Basin, Texas, *Water*, 8, <https://doi.org/10.3390/w8120603>, 2016.
- 466 Babst, F., Poulter, B., Trouet, V., Tan, K., Neuwirth, B., Wilson, R., Carrer, M., Grabner, M.,  
467 Tegel, W., Levanic, T., Panayotov, M., Urbinati, C., Bouriaud, O., Ciais, P., and Frank, D.: Site-  
468 and species-specific responses of forest growth to climate across the European continent, *Global*  
469 *Ecology and Biogeography*, 22, 706-717, <https://doi.org/10.1111/geb.12023>, 2013.
- 470 Ballesteros-Canovas, J., Stoffel, M., St. George, S., and Katie, H.: A review of flood records from  
471 tree rings, *Progress in Physical Geography*, 1-23, <https://doi.org/10.1177/0309133315608758>,  
472 2015.
- 473 Barrow, W. C., and Renne, I.: Interactions between migrant landbirds and an invasive exotic plant:  
474 the Chinese tallow tree, *Flyway*, 8:11, 2001.
- 475 Barrow, W. C., Johnson Randall, L. A., Woodrey, M. S., Cox, J., Ruelas Inzunza, E., Riley, C. M.,  
476 Hamilton, R. B., and Eberly, C.: Coastal forests of the Gulf of Mexico: a description and some  
477 thoughts on their conservation, General Technical Report PSWGTR-191, U.S. Department of  
478 Agriculture, Forest Service, Washington, D.C. , 2005.
- 479 Blann, K., Anderson, J., Sands, G., and Vondracek, B.: Effects of agricultural drainage on aquatic  
480 ecosystems: A review, *Critical Reviews in Environmental Science and Technology*, 39, 909-1001,  
481 <https://doi.org/10.1080/10643380801977966>, 2009.
- 482 Bray, W. L.: Distribution and adaptation of the vegetation of Texas, Bulletin 82. no. 10. University  
483 of Texas. Austin, 1906.
- 484 Brooks, J. R., Flanagan, L. B., and Ehleringer, J. R.: Responses of boreal conifers to climate  
485 fluctuations: indications from tree-ring widths and carbon isotope analyses, *Canadian Journal of*  
486 *Forest Research*, 28, 524-533, <https://doi.org/10.1139/x98-018>, 1998.
- 487 Buhay, W. M., Timsic, S., Blair, D., Reynolds, J., Jarvis, S., Petrash, D., Rempel, M., and Bailey,  
488 D.: Riparian influences on carbon isotopic composition of tree rings in the Slave River Delta,  
489 Northwest Territories, Canada, *Chemical Geology*, 252, 9-20,  
490 <https://doi.org/10.1016/j.chemgeo.2008.01.012>, 2008.
- 491 Charney, N. D., Babst, F., Poulter, B., Record, S., Trouet, V. M., Frank, D., Enquist, B. J., and  
492 Evans, M. E. K.: Observed forest sensitivity to climate implies large changes in 21st century North  
493 American forest growth, *Ecology Letters*, 19, 1119-1128, <https://doi.org/10.1111/ele.12650>, 2016.
- 494 Clawson, R. G., Lockaby, B. G., and Rummer, B.: Changes in production and nutrient cycling  
495 across a wetness gradient within a floodplain forest, *Ecosystems*, 4, 126-138,  
496 <https://doi.org/10.1007/s100210000063>, 2001.
- 497 Cook, E. R., and Holmes, R. L.: Program ARSTAN users manual, Laboratory of Tree-Ring  
498 Research, University of Arizona, Tucson, 15, 1984.



- 499 Coplen, T. B.: Reporting of stable hydrogen, carbon, and oxygen isotopic abundances,  
500 Geothermics, 24, 707-712, [https://doi.org/10.1016/0375-6505\(95\)00024-0](https://doi.org/10.1016/0375-6505(95)00024-0), 1995.
- 501 Crawford, R. M. M.: Physiological responses to flooding, in: Physiological Plant Ecology II.  
502 Encyclopedia of Plant Physiology (New Series), edited by: Lange, O. L., Nobel, P. S., Osmond,  
503 C. B., and Ziegler, H. e., Springer, Berlin, Heidelberg, 453-477, 1982.
- 504 Cullen, L., and Macfarlane, C.: Comparison of cellulose extraction methods for analysis of stable  
505 isotope ratios of carbon and oxygen in plant material, Tree Physiology, 25, 563-569,  
506 <https://doi.org/10.1093/treephys/25.5.563>, 2005.
- 507 Dahl, T. E.: Status and trends of wetlands in the conterminous United States 2004 to 2009, U.S.  
508 Fish and Wildlife Service, [https://www.fws.gov/wetlands/Documents/Status-and-Trends-of-](https://www.fws.gov/wetlands/Documents/Status-and-Trends-of-Wetlands-in-the-Conterminous-United-States-2004-to-2009.pdf)  
509 [Wetlands-in-the-Conterminous-United-States-2004-to-2009.pdf](https://www.fws.gov/wetlands/Documents/Status-and-Trends-of-Wetlands-in-the-Conterminous-United-States-2004-to-2009.pdf), 2011.
- 510 Davies, F. S., and Flore, J. A.: Flooding, gas exchange and hydraulic root conductivity of highbush  
511 blueberry, Physiologia Plantarum, 67, 545-551, [https://doi.org/10.1111/j.1399-](https://doi.org/10.1111/j.1399-3054.1986.tb05053.x)  
512 [3054.1986.tb05053.x](https://doi.org/10.1111/j.1399-3054.1986.tb05053.x), 1986.
- 513 Easterling, D. R., Meehl, G. A., Parmesan, C., Changnon, S. A., Karl, T. R., and Mearns, L. O.:  
514 Climate Extremes: Observations, Modeling, and Impacts, Science, 289, 2068-2074,  
515 <https://doi.org/10.1126/science.289.5487.2068>, 2000.
- 516 Ehleringer, J. R., Hall, A. E., and Farquhar, G. D.: Stable isotopes and plant carbon/water relations,  
517 Academic Press, San Diego, 555 pp., 1993.
- 518 Erwin, K. L.: Wetlands and global climate change: the role of wetland restoration in a changing  
519 world, Wetlands Ecology and Management, 17, 71, <https://doi.org/10.1007/s11273-008-9119-1>,  
520 2008.
- 521 Ewe, S. M., and Sternberg, D. L.: Seasonal water-use by the invasive exotic, *Schinus*  
522 *terebinthifolius*, in native and disturbed communities, Oecologia, 133, 441-448,  
523 <https://doi.org/10.1007/s00442-002-1047-9>, 2002.
- 524 Ewe, S. M. L., and Sternberg, L.: Seasonal gas exchange characteristics of *Schinus terebinthifolius*  
525 in a native and disturbed upland community in Everglades National Park, Florida, Forest Ecology  
526 and Management, 179, 27-36, [https://doi.org/10.1016/S0378-1127\(02\)00531-5](https://doi.org/10.1016/S0378-1127(02)00531-5), 2003.
- 527 Fang, K., Gou, X., Chen, F., Cook, E., Li, J., Buckley, B., and D'Arrigo, R.: Large-scale  
528 precipitation variability over Northwest China inferred from tree rings, Journal of Climate, 24,  
529 3457-3468, <https://doi.org/10.1175/2011JCLI3911.1>, 2011.
- 530 Farquhar, G. D., Hubick, K. T., Condon, A. G., and Richards, R. A.: Carbon isotope fractionation  
531 and plant water-use efficiency, in: Stable Isotopes in Ecological Research, edited by: Rundel, P.  
532 W., Ehleringer, J. R., and Nagy, K. A., Ecological Studies (Analysis and Synthesis), Springer,  
533 New York, NY, 21-40, 1989.
- 534 Ferrati, R., Ana Canziani, G., and Ruiz Moreno, D.: Esteros del Ibera: hydrometeorological and  
535 hydrological characterization, Ecological Modelling, 186, 3-15,  
536 <https://doi.org/10.1016/j.ecolmodel.2005.01.021>, 2005.
- 537 Francey, R., Allison, C., Etheridge, D., Trudinger, C., Enting, I. G., Leuenberger, M., Langenfelds,  
538 R., Michel, E., and Steele, L. P.: A 1000-year high precision record of  $\delta^{13}\text{C}$  in atmospheric  $\text{CO}_2$ ,  
539 Tellus B, 51, 170-193, <https://doi.org/10.1034/j.1600-0889.1999.t01-1-00005.x>, 2002.
- 540 Gao, S., Liu, R., Zhou, T., Fang, W., Yi, C., Lu, R., Zhao, X., and Luo, H.: Dynamic responses of  
541 tree-ring growth to multiple dimensions of drought, Global Change Biology, 24, 5380-5390,  
542 <https://doi.org/10.1111/gcb.14367>, 2018.





- 543 Gee, H. K. W., King, S. L., and Keim, R. F.: Tree growth and recruitment in a leveed floodplain  
544 forest in the Mississippi River Alluvial Valley, USA, *Forest Ecology and Management*, 334, 85-  
545 95, <https://doi.org/10.1016/j.foreco.2014.08.024>, 2014.
- 546 Gessler, A., Brandes, E., Buchmann, N., Helle, G., Rennenberg, H., and Barnard Romain, L.:  
547 Tracing carbon and oxygen isotope signals from newly assimilated sugars in the leaves to the tree-  
548 ring archive, *Plant, Cell & Environment*, 32, 780-795, [https://doi.org/10.1111/j.1365-  
549 3040.2009.01957.x](https://doi.org/10.1111/j.1365-3040.2009.01957.x), 2009.
- 550 Gessler, A., Ferrio, J. P., Hommel, R., Treydte, K., Werner, R. A., and Monson, R. K.: Stable  
551 isotopes in tree rings: towards a mechanistic understanding of isotope fractionation and mixing  
552 processes from the leaves to the wood, *Tree Physiology*, 34, 796-818,  
553 <https://doi.org/10.1093/treephys/tpu040>, 2014.
- 554 *Quercus nigra*: Water Oak: <https://edis.ifas.ufl.edu/pdffiles/ST/ST55300.pdf>, 1994.
- 555 Graven, H., Allison, C. E., Etheridge, D. M., Hammer, S., Keeling, R. F., Levin, I., Meijer, H. A.  
556 J., Rubino, M., Tans, P. P., Trudinger, C. M., Vaughn, B. H., and White, J. W. C.: Compiled  
557 records of carbon isotopes in atmospheric CO<sub>2</sub> for historical simulations in CMIP6, *Geosci. Model*  
558 *Dev.*, 10, 4405-4417, <https://doi.org/10.5194/gmd-10-4405-2017>, 2017.
- 559 Green, J. W.: Wood cellulose, in: *Methods in Carbohydrate Chemistry*, edited by: Whistler, R. L.,  
560 Academic Press, New York, 9-21, 1963.
- 561 Griffith, B., Omernik, Comstock, Rogers, Harrison, Hatch, Bezanson: *Ecoregions of Texas*, U.S.,  
562 Environmental Protection Agency, Corvallis, OR, 2004.
- 563 Grissino-Mayer, H.: Evaluating crossdating accuracy: a manual and tutorial for the computer  
564 program COFECHA, *Tree-Ring Research*, 57, 205-221, 2001.
- 565 Gutschick, and Hormoz, B.: Extreme events as shaping physiology, ecology, and evolution of  
566 plants: toward a unified definition and evaluation of their consequences, *New Phytologist*, 160,  
567 21-42, <https://doi.org/10.1046/j.1469-8137.2003.00866.x>, 2003.
- 568 Helle, G., and Schleser, G. H.: Beyond CO<sub>2</sub>-fixation by Rubisco – an interpretation of <sup>13</sup>C/<sup>12</sup>C  
569 variations in tree rings from novel intra-seasonal studies on broad-leaf trees, *Plant, Cell &*  
570 *Environment*, 27, 367-380, <https://doi.org/10.1111/j.0016-8025.2003.01159.x>, 2004.
- 571 Hoerling, M., Kumar, A., Dole, R., Nielsen-Gammon, J. W., Eischeid, J., Perlwitz, J., Quan, X.-  
572 W., Zhang, T., Pegion, P., and Chen, M.: Anatomy of an extreme event, *Journal of Climate*, 26,  
573 2811-2832, <https://doi.org/10.1175/jcli-d-12-00270.1>, 2013.
- 574 Houston Wilderness: Houston Wilderness, Houston Atlas of Biodiversity, Columbia Bottomlands  
575 map, Texas A&M Press. URL: <http://houstonwilderness.org/colombia-bottomlands>, 2007.
- 576 Jackson, M. B., and Drew, M. C.: Effects of flooding on growth and metabolism of herbaceous  
577 Plants in: *Flooding and Plant Growth*, edited by: Kozlowski, T. T., Academic Press, San Diego,  
578 47-128, 1984.
- 579 Jiang, X., and Yang, Z. L.: Projected changes of temperature and precipitation in Texas from  
580 downscaled global climate models, *Clim Res*, 53, 229-244, <https://doi.org/10.3354/cr01093>, 2012.
- 581 Kearns, T., Wang, G., Bao, Y., Jiang, J., and Lee, D.: Current land subsidence and groundwater  
582 level changes in the Houston Metropolitan Area (2005–2012), *Journal of Surveying Engineering*,  
583 141, 05015002, [https://doi.org/10.1061/\(ASCE\)SU.1943-5428.0000147](https://doi.org/10.1061/(ASCE)SU.1943-5428.0000147), 2015.
- 584 Keeling, R. F., and Keeling, C. D.: Atmospheric In Situ CO<sub>2</sub> Data - La Jolla Pier, California and  
585 Mauna Loa Observatory, Hawaii. In *Scripps CO<sub>2</sub> Program Data*, UC San Diego Library Digital  
586 Collections, <https://doi.org/10.6075/J0QJ7F7N>, 2017.



- 587 Knutson, T., McBride, J., Chan, J., Emanuel, K., Holland, G., Landsea, C., Held, I., Kossin, J.,  
588 Srivastava, A., and Sugi, M.: Tropical cyclones and climate change, *Nature Geoscience*, 3,  
589 <https://doi.org/10.1038/ngeo779>, 2010.
- 590 Koppen, W.: Versuch einer Klassifikation der Klimate, vorzugsweise nach ihren Beziehungen zur  
591 Pflanzenwelt, *Geographische Zeitschrift*, 6, 593-611, <http://www.jstor.org/stable/27803924>, 1900.
- 592 Kozłowski, T.: Physiological-ecological impacts of flooding on riparian forest ecosystems,  
593 *Wetlands*, 22, 550-561, [https://doi.org/10.1672/0277-5212\(2002\)022\[0550:PEIOFO\]2.0.CO;2](https://doi.org/10.1672/0277-5212(2002)022[0550:PEIOFO]2.0.CO;2),  
594 2002.
- 595 Kozłowski, T. T., and Pallardy, S. G.: Effect of Flooding on Water, Carbohydrate, and Mineral  
596 Relations, in: *Flooding and Plant Growth*, edited by: Kozłowski, T. T., Academic Press, San  
597 Diego, 165-193, 1984.
- 598 Kozłowski, T. T.: Responses of woody plants to flooding and salinity, *Tree Physiology*, 17, 490-  
599 490, <https://doi.org/10.1093/treephys/17.7.490>, 1997.
- 600 Leavitt, S., Wright, W., and Long, A.: Spatial expression of ENSO, drought, and summer monsoon  
601 in seasonal  $\delta^{13}\text{C}$  of ponderosa pine tree rings in southern Arizona and New Mexico, *Journal of*  
602 *Geophysical Research Atmospheres*, 107, ACL 3-1-ACL 3-10,  
603 <https://doi.org/10.1029/2001JD001312>, 2002.
- 604 Leavitt, S. W., and Danzer, S. R.: Method for batch processing small wood samples to  
605 holocellulose for stable-carbon isotope analysis, *Analytical Chemistry*, 65, 87-89,  
606 <https://doi.org/10.1021/ac00049a017>, 1993.
- 607 LeBlanc, D. C., and Stahle, D. W.: Radial growth responses of four oak species to climate in  
608 eastern and central North America, *Canadian Journal of Forest Research*, 45, 793-804,  
609 <https://doi.org/10.1139/cjfr-2015-0020>, 2015.
- 610 Lipp, J., Trimborn, P., Edwards, T., Waisel, Y., and Yakir, D.: Climatic effects on the  $\delta^{18}\text{O}$  and  
611  $\delta^{13}\text{C}$  of cellulose in the desert tree *Tamarix jordanis*, *Geochimica et Cosmochimica Acta*, 60, 3305-  
612 3309, [https://doi.org/10.1016/0016-7037\(96\)00166-4](https://doi.org/10.1016/0016-7037(96)00166-4), 1996.
- 613 McCarroll, D., and Loader, N. J.: Stable isotopes in tree rings, *Quaternary Science Reviews*, 23,  
614 771-801, <https://doi.org/10.1016/j.quascirev.2003.06.017>, 2004.
- 615 Meko, M. D., and Therrell, M. D.: A record of flooding on the White River, Arkansas derived  
616 from tree-ring anatomical variability and vessel width, *Physical Geography*, 41, 83-98,  
617 <https://doi.org/10.1080/02723646.2019.1677411>, 2020.
- 618 Miao, S., Zou, C., and Breshears, D.: Vegetation responses to extreme hydrological events:  
619 Sequence matters, *The American Naturalist*, 173, 113-118, <https://doi.org/10.1086/593307>, 2009.
- 620 Mikac, S., Žmegač, A., Trlin, D., Paulić, V., Oršanić, M., and Anić, I.: Drought-induced shift in  
621 tree response to climate in floodplain forests of Southeastern Europe, *Scientific Reports*, 8, 16495,  
622 <https://doi.org/10.1038/s41598-018-34875-w>, 2018.
- 623 Moore, G., Edgar, C. B., Vogel, J., Washington-Allen, R., March, R., and Zehnder, R.: Tree  
624 mortality from an exceptional drought spanning mesic to semiarid ecoregions, *Ecological*  
625 *Applications*, 26, <https://doi.org/10.1890/15-0330.1>, 2015.
- 626 National Inventory of Dams, U.S. Army Corps of Engineers:  
627 <https://nid.sec.usace.army.mil/ords/f?p=105:113:891673838449::NO:::>, access: 3/26/2020, 2020.
- 628 NOAA: National Centers for Environmental Information, National Oceanic and Atmospheric  
629 Administration, United States Department of Commerce. Available online at  
630 <https://www.ncdc.noaa.gov/data-access/land-based-station-data>. Accessed [07/18/2018], 2018.



631 NRCS: Soil Survey Staff, Natural Resources Conservation Service, United States Department of  
632 Agriculture. Web Soil Survey. Available online at the following link:  
633 <https://websoilsurvey.sc.egov.usda.gov/>. Accessed [02/09/2020], 2020.

634 Porter, T. J., Pisaric, M. F. J., Kokelj, S. V., and Edwards, T. W. D.: Climatic signals in  $\delta^{13}\text{C}$  and  
635  $\delta^{18}\text{O}$  of tree-rings from white spruce in the Mackenzie Delta Region, Northern Canada, Arctic,  
636 Antarctic, and Alpine Research, 41, 497-505, <https://doi.org/10.1657/1938-4246-41.4.497>, 2009.

637 Putnam, J. A., Furnival, G. M., and McKnight, J. S.: Management and Inventory of Southern  
638 Hardwoods. Agriculture Handbook 181. U.S. Department of Agriculture, Forest Service.  
639 Washington, D.C. , 1960.

640 R Core Team: R: A language and environment for statistical computing. R Foundation for  
641 Statistical Computing, Vienna, Austria. ISBN 3-900051-07-0, <http://www.R-project.org/>, 2012.

642 Robertson, I., Switsur, V. R., Carter, A. H. C., Barker, A. C., Waterhouse, J. S., Briffa, K. R., and  
643 Jones, P. D.: Signal strength and climate relationships in  $^{13}\text{C}/^{12}\text{C}$  ratios of tree ring cellulose from  
644 oak in east England, Journal of Geophysical Research: Atmospheres, 102, 19507-19516,  
645 <https://doi.org/10.1029/97JD01226>, 1997.

646 Rosen, D., Steven, D., and Lange, M.: Conservation strategies and vegetation characterization in  
647 the Columbia Bottomlands, an under-recognized southern floodplain forest formation, Natural  
648 Areas Journal, 28, 74-82, [https://doi.org/10.3375/0885-8608\(2008\)28\[74:CSAVCI\]2.0.CO;2](https://doi.org/10.3375/0885-8608(2008)28[74:CSAVCI]2.0.CO;2),  
649 2008.

650 Saurer, M., Siegenthaler, U., and Schweingruber, F.: The climate-carbon isotope relationship in  
651 tree rings and the significance of site conditions, Tellus B: Chemical and Physical Meteorology,  
652 47, 320-330, <https://doi.org/10.3402/tellusb.v47i3.16051>, 1995.

653 Schmidt, D. H., and Garland, K. A.: Bone dry in Texas: Resilience to drought on the Upper Texas  
654 Gulf Coast, Journal of Planning Literature, 27, 434-445,  
655 <https://doi.org/10.1177/0885412212454013>, 2012.

656 Schollaen, K., Heinrich, I., Neuwirth, B., Krusic, P. J., D'Arrigo, R. D., Karyanto, O., and Helle,  
657 G.: Multiple tree-ring chronologies (ring width,  $\delta^{13}\text{C}$  and  $\delta^{18}\text{O}$ ) reveal dry and rainy season signals  
658 of rainfall in Indonesia, Quaternary Science Reviews, 73, 170-181,  
659 <https://doi.org/10.1016/j.quascirev.2013.05.018>, 2013.

660 Seager, Ting, M., Held, I., Kushnir, Y., Lu, J., Vecchi, G., Huang, H.-P., Harnik, N., Leetmaa, A.,  
661 Lau, N.-C., Li, C., Velez, J., and Naik, N.: Model projections of an imminent transition to a more  
662 arid climate in southwestern North America, Science, 316, 1181,  
663 <https://doi.org/10.1126/science.1139601>, 2007.

664 Sebastian, A., Gori, A., Blessing, R. B., van der Wiel, K., and Bass, B.: Disentangling the impacts  
665 of human and environmental change on catchment response during Hurricane Harvey,  
666 Environmental Research Letters, 14, 124023, <https://doi.org/10.1088/1748-9326/ab5234>, 2019.

667 Speer, J.: The Fundamentals of Tree-Ring Research, University of Arizona Press, Tucson,  
668 Arizona, 2012.

669 St. George, S.: An overview of tree-ring width records across the Northern Hemisphere,  
670 Quaternary Science Reviews, 95, 132-150, <https://doi.org/10.1016/j.quascirev.2014.04.029>, 2014.

671 Stokes, M. A., and Smiley, T. L.: An Introduction to Tree-Ring Dating, The University of Arizona  
672 Press, Tucson, Arizona, 1968.

673 Stuiver, M., Burk, R. L., and Quay, P. D.:  $^{13}\text{C}/^{12}\text{C}$  ratios in tree rings and the transfer of biospheric  
674 carbon to the atmosphere, Journal of Geophysical Research: Atmospheres, 89, 11731-11748,  
675 <https://doi.org/10.1029/JD089iD07p11731>, 1984.



- 676 Szejner, P., Belmecheri, S., Ehleringer, J. R., and Monson, R. K.: Recent increases in drought  
677 frequency cause observed multi-year drought legacies in the tree rings of semi-arid forests,  
678 *Oecologia*, 192, 241-259, <https://doi.org/10.1007/s00442-019-04550-6>, 2020.
- 679 Tei, S., Sugimoto, A., Yonenobu, H., Matsuura, Y., Osawa, A., Sato, H., Fujinuma, J., and  
680 Maximov, T.: Tree-ring analysis and modeling approaches yield contrary response of circumboreal  
681 forest productivity to climate change, *Global Change Biology*, 23, 5179-5188,  
682 <https://doi.org/10.1111/gcb.13780>, 2017.
- 683 Therrell, M. D., and Bialecki, M. B.: A multi-century tree-ring record of spring flooding on the  
684 Mississippi River, *Journal of Hydrology*, 529, 490-498,  
685 <https://doi.org/10.1016/j.jhydrol.2014.11.005>, 2015.
- 686 TWDB: 2017 Texas State Water Plan, Texas Water Development Board,  
687 <http://www.twdb.texas.gov/waterplanning/swp/2017/doc/SWP17-Water-for-Texas.pdf>, 2017.
- 688 USFWS: Draft Land Protection Plan Austin's Woods San Bernard National Wildlife Refuge  
689 Brazoria, Fort Bend, Matagorda and Wharton Counties Texas Texas Mid-coast NWR Complex  
690 Draft Comprehensive Conservation Plan and Environmental Assessment,  
691 [https://www.fws.gov/southwest/refuges/plan/PDFs/TMC%20CCP%20files/15\\_Appendix%20I.%20LPP\\_Austins\\_woods\\_08-10-12.pdf](https://www.fws.gov/southwest/refuges/plan/PDFs/TMC%20CCP%20files/15_Appendix%20I.%20LPP_Austins_woods_08-10-12.pdf), 1997.
- 692  
693 van Oldenborgh, G. J., van der Wiel, K., Sebastian, A., Singh, R., Arrighi, J., Otto, F., Haustein,  
694 K., Li, S., Vecchi, G., and Cullen, H.: Attribution of extreme rainfall from Hurricane Harvey,  
695 August 2017, *Environmental Research Letters*, 12, 124009, <https://doi.org/10.1088/1748-9326/aa9ef2>, 2017.
- 696  
697 Vivian, L. M., Godfree, R. C., Colloff, M. J., Mayence, C. E., and Marshall, D. J.: Wetland plant  
698 growth under contrasting water regimes associated with river regulation and drought: implications  
699 for environmental water management, *Plant Ecology*, 215, 997-1011,  
700 <https://doi.org/10.1007/s11258-014-0357-4>, 2014.
- 701 Wang, H.-Q., Chen, F., Ermenbaev, B., and Satylkanov, R.: Comparison of drought-sensitive tree-  
702 ring records from the Tien Shan of Kyrgyzstan and Xinjiang (China) during the last six centuries,  
703 *Advances in Climate Change Research*, 8, 18-25, <https://doi.org/10.1016/j.accre.2017.03.004>,  
704 2017.
- 705 Wear, D. N., and Greis, J. G.: Southern forest resource assessment, Final Report Technical SRS-  
706 53. U.S. Department of Agriculture, Forest Service, Southern Research Station. Asheville, NC.  
707 635 p., 053, <https://www.srs.fs.usda.gov/pubs/4833>, 2002.

708

709
